# Supplementary material for: Spectroscopy of a rotating hydrogen molecule in carbon nanotubes
Source: Royal Society of Chemistry journal article supplement (doi:10.1039/c8cp04109a), 2018-08-06
Supplement: c8cp04109a1.pdf [file c8cp04109a1.pdf]

# Supplementary material for the manuscript: "Spectroscopy of a rotating hydrogen molecule in carbon nanotubes"

María Pilar de Lara-Castells<sup>\*,†</sup> and Alexander O. Mitrushchenkov<sup>\*,‡</sup>

*Instituto de Física Fundamental (C.S.I.C.), Serrano 123, E-28006, Madrid, Spain, and Université  
Paris-Est, Laboratoire Modélisation et Simulation Multi Echelle, MSME UMR 8208 CNRS, 5 bd  
Descartes, 77454 Marne-la-Vallée, France*

E-mail: Pilar.deLara.Castells@csic.es; Alexander.Mitrushchenkov@u-pem.fr

The first section of this supplementary material provides pictures showing the accuracy of the fittings to the potential model proposed in this work as well as the parameters and coefficients of the potential fit. In this section, the explicit transformation from Eq. (4) to Eq. (5) of the main text is also provided. The second section presents four tables with the complete list of calculated molecular energy levels for a rotating molecule of hydrogen inside and outside carbon nanotubes. Section S3 provides explicit expressions for the calculation of angular factors from the Hamiltonian matrix elements. Finally, details on the reasons why the  $(n\ 1\ 0)$  and  $(n\ 1\ 1a)$  levels are degenerate for wide carbon nanotubes are presented in section S4.

---

\*To whom correspondence should be addressed

<sup>†</sup>Instituto de Física Fundamental (C.S.I.C.), Serrano 123, E-28006, Madrid, Spain

<sup>‡</sup>Université Paris-Est, Laboratoire Modélisation et Simulation Multi Echelle, MSME UMR 8208 CNRS, 5 bd Descartes, 77454 Marne-la-Vallée, France

# S1 Fittings of model potentials

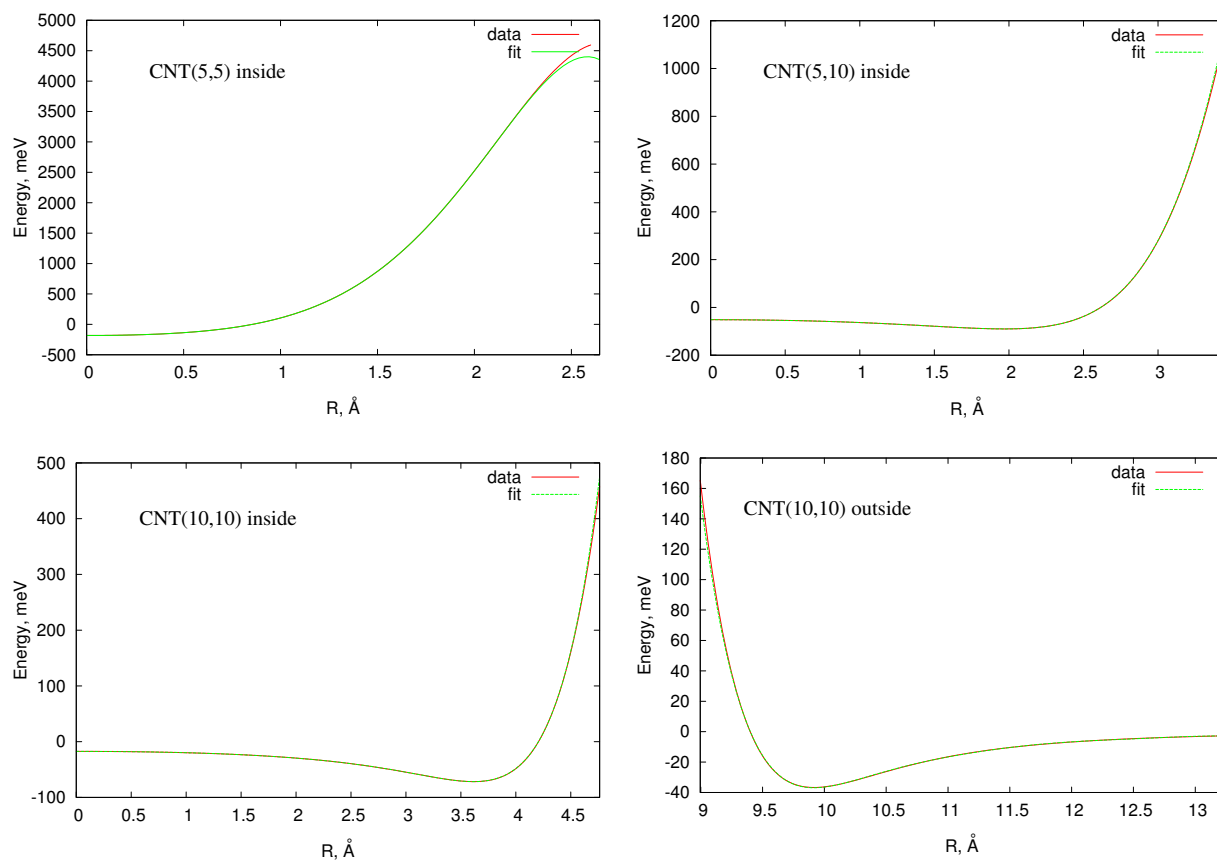

Figure S1: Pictures showing the accuracy of the fitting of  $H_2$ -nanotube interaction potentials to polynomial expansions for nanotubes of different helicity indexes  $(n, m)$ , with  $H_2$  both inside and outside of the nanotubes (see Eq. (4) of the main manuscript).

As discussed in the main text, the model H-CNT interaction potential  $V_{\text{H-CNT}}$  is expanded in a polynomial series

$$V_{\text{H-CNT}}(\rho^2) = \sum_{L=0}^n V_L (\rho^2 - \rho_0^2)^L. \quad (\text{S1})$$

Considering the expression of  $\rho_{\pm}^2$  (see Eq. (2) of the main text), we can write

$$\begin{aligned} (\rho_{\pm}^2 - \rho_0^2)^L &= \sum_{K=0}^L (\pm 1)^K \binom{L}{K} \\ &\times \left( R^2 + \frac{r_0^2(1-x^2)}{4} - R_0^2 \right)^{L-K} \left( r_0 R \sqrt{1-x^2} \cos(\phi) \right)^K \end{aligned} \quad (\text{S2})$$

Next, we notice that the total potential  $V_{\text{H}_2\text{-CNT}}$  is the sum of  $V_{\text{H-CNT}}(\rho_+^2)$  and  $V_{\text{H-CNT}}(\rho_-^2)$ . Hence, it is clear that the terms with odd  $k$  cancel. Therefore, we will have

$$\begin{aligned} V(R, x, \phi) &= 2 \sum_{L=0}^n V_L \sum_{K=0}^{L/2} \binom{L}{2K} \\ &\times \left( R^2 + \frac{r_0^2(1-x^2)}{4} - R_0^2 \right)^{L-2K} \left( r_0^2 R^2 (1-x^2) \cos^2(\phi) \right)^K \end{aligned} \quad (\text{S3})$$

which can be written in a simplified form as

$$V(R, x, \phi) = \sum_{I,L=0}^n \sum_{K=0}^I P_{JIK} (R^2 - R_0^2)^J (1-x^2)^I \cos^{2K}(\phi), \quad (\text{S4})$$

with coefficients explicitly given as

$$\begin{aligned} P_{JIK} &= \sum_{L=\max(2K, I+J, I+K)}^{\min(n, I+J+K)} V_L \binom{l}{2K} \binom{L-2K}{I-K} \\ &\quad \binom{K}{I+J+K-L} \frac{(r_0^2)^I}{4^{I-K}} (R_0^2)^{L-I-J} \end{aligned} \quad (\text{S5})$$

which corresponds to Eq. 5 of the main text. The coefficients of the polynomial fit are provided in Table S1.

Table S1: Parameters of potential fit,  $R_0^2$  (in bohr<sup>2</sup>) and  $V_l$  (in meV), see Eq. (5) of the main text. Powers of 10 are given in parentheses.

|         | (5,5)     | (10,5)     | (10,10)    | (10,10)-ext |
|---------|-----------|------------|------------|-------------|
| $R_0^2$ | 0         | 13.859     | 46.643     | 351.08      |
| $l$     | (5,5)     | (10,5)     | (10,10)    | (10,10) ext |
| 0       | -182.815  | -89.921    | -71.713    | -36.883     |
| 1       | 42.910    | 0          | 0          | 0           |
| 2       | 9.7137    | 0.4672     | 0.14339    | 0.01400     |
| 3       | 0.31236   | 0.02651    | 5.511(-3)  | -2.908(-4)  |
| 4       | -0.019169 | 5.401(-4)  | 9.052(-5)  | 3.100(-6)   |
| 5       | 0         | -1.097(-6) | 5.804(-7)  | -1.930(-8)  |
| 6       | 0         | -1.592(-7) | 1.229(-10) | 6.997(-11)  |
| 7       | 0         | 0          | 0          | -1.362(-13) |
| 8       | 0         | 0          | 0          | 1.099(-16)  |

**S2 Energy levels (in  $\text{cm}^{-1}$ ) of a rotating  $\text{H}_2$  molecule inside and outside carbon nanotubes for  $n, j, |m| \leq 3$  and  $\Lambda \leq 6$ .**

Table S2: Energy levels (in  $\text{cm}^{-1}$ ) of a rotating  $\text{H}_2$  molecule inside nanotube of helicity index (5,5), for  $n, j, |m| \leq 3$  and  $\Lambda \leq 6$ . The energies at the potential minima ( $E_{\min}$ , in  $\text{cm}^{-1}$ ) and the zero-point energies ( $E_{zp}$ , in  $\text{cm}^{-1}$ ) are also collected. The energy values are relative to that of the ground state (0 0 0). The energy of the ground state (0 0 0) is given between parenthesis. For  $\Lambda > 0$ ,  $\Delta E_{\Lambda} = (E_{\Lambda} - E_{\Lambda-1}) / ((\Lambda - m)^2 - (\Lambda - 1 - m)^2)$ , to reflect the leading character of the  $1/R^2$  term. The energies of the lowest bound states without including the rotation are presented in brackets.

| CNT(5,5)                     |       |     |                 |                        |                        |                        |                        |                        |                        |
|------------------------------|-------|-----|-----------------|------------------------|------------------------|------------------------|------------------------|------------------------|------------------------|
| $d_{\text{CNT}}, \text{\AA}$ | 6.7   |     |                 |                        |                        |                        |                        |                        |                        |
| $E_{\min}, \text{cm}^{-1}$   | -1474 |     |                 |                        |                        |                        |                        |                        |                        |
| $E_{zp}, \text{cm}^{-1}$     | 474   |     |                 |                        |                        |                        |                        |                        |                        |
| $n$                          | $j$   | $m$ | $E_{\Lambda=0}$ | $\Delta E_{\Lambda=1}$ | $\Delta E_{\Lambda=2}$ | $\Delta E_{\Lambda=3}$ | $\Delta E_{\Lambda=4}$ | $\Delta E_{\Lambda=5}$ | $\Delta E_{\Lambda=6}$ |
| 0                            | 0     | 0   | 0.000           | 154.088                | 78.937                 | 52.695                 | 38.218                 | 30.608                 | 31.370                 |
|                              |       |     | (-997.908)      |                        |                        |                        |                        |                        |                        |
|                              |       |     | [-1147.07]      |                        |                        |                        |                        |                        |                        |
| 0                            | 1     | 0   | 61.429          | 150.275                | 78.342                 | 50.354                 | 37.367                 | 29.950                 | 30.742                 |
| 0                            | 1     | 1   | 340.182         | 175.372                | 159.478                | 82.620                 | 52.640                 | 38.782                 | 39.718                 |
| 0                            | 1     | -1  | 309.649         | 87.381                 | 51.542                 | 38.849                 | 31.274                 | 26.285                 | 26.885                 |
| 0                            | 2     | 0   | 338.445         | 154.303                | 81.558                 | 52.003                 | 38.760                 | 31.111                 | 31.961                 |
| 0                            | 2     | 1   | 510.758         | 166.231                | 154.749                | 80.522                 | 51.679                 | 38.295                 | 39.412                 |
| 0                            | 2     | -1  | 488.408         | 83.985                 | 50.840                 | 38.090                 | 30.690                 | 25.803                 | 26.417                 |
| 0                            | 2     | 2   | 825.042         | 80.415                 | 159.407                | 155.041                | 83.441                 | 53.319                 | 55.139                 |
| 0                            | 2     | -2  | 835.032         | 54.831                 | 40.083                 | 31.939                 | 26.774                 | 23.139                 | 23.570                 |
| 0                            | 3     | 0   | 689.682         | 152.101                | 81.405                 | 51.414                 | 38.362                 | 30.822                 | 31.676                 |
| 0                            | 3     | 1   | 859.625         | 169.543                | 158.271                | 81.161                 | 51.939                 | 38.527                 | 39.693                 |
| 0                            | 3     | -1  | 835.818         | 85.115                 | 51.153                 | 38.306                 | 30.852                 | 25.962                 | 26.600                 |
| 0                            | 3     | 2   | 1126.917        | 79.799                 | 160.623                | 157.678                | 81.982                 | 52.602                 | 54.554                 |
| 0                            | 3     | -2  | 1130.289        | 54.551                 | 39.403                 | 31.094                 | 26.229                 | 22.746                 | 23.227                 |
| 0                            | 3     | 3   | 1473.529        | 54.760                 | 82.413                 | 165.252                | 164.856                | 85.598                 | 91.605                 |
| 0                            | 3     | -3  | 1479.539        | 40.835                 | 31.824                 | 27.072                 | 22.268                 | 20.785                 | 21.046                 |
| 1                            | 0     | 0   | 522.302         | 169.873                | 82.921                 | 58.505                 | 40.883                 | 32.558                 | 33.050                 |
|                              |       |     | [486.978]       |                        |                        |                        |                        |                        |                        |
| 1                            | 1     | 0   | 571.230         | 165.199                | 85.158                 | 54.344                 | 40.043                 | 31.895                 | 32.558                 |
| 1                            | 1     | 1   | 912.150         | 197.479                | 176.974                | 90.558                 | 56.129                 | 41.107                 | 41.986                 |
| 1                            | 1     | -1  | 857.645         | 96.142                 | 53.824                 | 41.170                 | 33.063                 | 27.710                 | 28.260                 |
| 1                            | 2     | 0   | 877.251         | 151.240                | 89.038                 | 55.716                 | 41.378                 | 33.049                 | 33.789                 |
| 1                            | 2     | 1   | 1058.936        | 188.652                | 174.559                | 88.120                 | 55.839                 | 41.037                 | 41.971                 |
| 1                            | 2     | -1  | 1019.278        | 93.142                 | 54.000                 | 40.623                 | 32.654                 | 27.344                 | 27.887                 |
| 1                            | 2     | 2   | 1390.569        | 81.314                 | 168.072                | 161.582                | 90.185                 | 57.178                 | 58.772                 |
| 1                            | 2     | -2  | 1414.431        | 59.326                 | 42.845                 | 33.718                 | 28.143                 | 24.188                 |                        |
| 1                            | 3     | 0   | 1220.591        | 148.815                | 89.525                 | 55.416                 | 41.169                 | 32.947                 | 179.729                |
| 1                            | 3     | 1   | 1408.118        | 184.325                | 171.068                | 89.074                 | 56.131                 | 41.377                 | 42.370                 |
| 1                            | 3     | -1  | 1369.420        | 93.450                 | 54.219                 | 40.851                 | 32.795                 | 27.500                 | 28.069                 |
| 1                            | 3     | 2   | 1689.711        | 82.611                 | 180.917                | 175.201                | 89.208                 | 56.789                 | 58.442                 |
| 1                            | 3     | -2  | 1698.469        | 59.295                 | 42.722                 | 32.828                 | 27.710                 | 23.990                 | 24.425                 |
| 1                            | 3     | 3   | 2078.505        | 60.299                 | 83.102                 | 188.674                | 183.884                | 93.483                 | 99.147                 |
| 1                            | 3     | -3  | 2090.666        | 39.731                 | 36.777                 | 26.198                 | -25.520                | 65.408                 |                        |
| 2                            | 0     | 0   | 1087.333        | 183.886                | 85.637                 | 63.805                 | 42.870                 | 35.047                 | 34.793                 |
|                              |       |     | [1022.891]      |                        |                        |                        |                        |                        |                        |
| 2                            | 1     | 0   | 1123.970        | 177.651                | 90.716                 | 57.671                 | 42.262                 | 33.491                 | 34.026                 |
| 2                            | 1     | 1   | 1521.755        | 223.847                | 189.885                | 99.253                 | 58.110                 | 128.011                | 46.207                 |
| 2                            | 1     | -1  | 1435.031        | 102.890                | 56.958                 | 43.208                 |                        |                        |                        |
| 2                            | 2     | 0   | 1465.285        | 141.410                | 95.510                 | 58.914                 | 43.695                 | 34.778                 | 35.432                 |
| 2                            | 2     | 1   | 1646.533        | 206.788                | 191.429                | 94.239                 | 59.332                 | 43.396                 | 44.209                 |
| 2                            | 2     | -1  | 1592.477        | 100.678                | 56.764                 | 42.869                 | 34.402                 | 28.722                 | 29.209                 |
| 2                            | 2     | 2   | 1992.091        | 81.006                 | 174.295                | 165.570                | 95.825                 | 60.418                 | 61.835                 |
| 2                            | 2     | -2  | 2029.057        | 62.988                 | 45.170                 | 35.063                 |                        |                        |                        |
| 2                            | 3     | 0   | 1800.404        | 146.406                | 96.621                 | 59.168                 | 132.448                | -38.760                |                        |
| 2                            | 3     | 1   | 1997.280        | 191.823                | 177.582                | 95.590                 | 59.650                 | 43.804                 | 44.689                 |
| 2                            | 3     | -1  | 1943.296        | 101.201                | 56.907                 | 43.142                 | 34.531                 | 28.887                 | 29.403                 |
| 2                            | 3     | 2   | 2289.438        | 83.446                 | 200.213                | 191.210                | 95.340                 | 60.355                 | 61.833                 |
| 2                            | 3     | -2  | 2304.237        | 63.219                 | 45.775                 | 34.221                 | 28.983                 | 25.105                 | 25.501                 |
| 3                            | 0     | 0   | 1687.142        | 197.185                | 324.850                | -71.936                | 44.899                 | 35.790                 | 36.421                 |
|                              |       |     | [1599.650]      |                        |                        |                        |                        |                        |                        |
| 3                            | 0     | 0   | 1687.142        | 197.185                | 324.850                | -71.936                | 44.899                 | 35.790                 | 36.421                 |
| 3                            | 1     | 0   | 1713.110        | 187.087                | 95.369                 | 60.382                 | 44.104                 | 39.738                 | -39.013                |
| 3                            | 1     | 1   | 2162.667        | 242.346                | 235.246                | 93.960                 |                        |                        |                        |
| 3                            | 1     | -1  | 2048.142        | 120.272                | 52.397                 |                        |                        |                        |                        |
| 3                            | 2     | 0   | 2089.220        | 131.882                | 101.186                | 61.720                 | 45.755                 | 36.323                 |                        |
| 3                            | 2     | 1   | 2267.823        | 222.087                | 205.927                | 99.427                 | 62.383                 | 45.483                 | 46.210                 |
| 3                            | 2     | -1  | 2201.894        | 107.058                | 59.273                 | 44.880                 | 35.975                 | 29.967                 | 30.408                 |
| 3                            | 2     | 2   | 2625.893        | 80.609                 | 234.817                | 224.272                | 100.564                | 63.127                 | 64.350                 |

Table S3: Energy levels (in  $\text{cm}^{-1}$ ) of a rotating  $\text{H}_2$  molecule inside nanotube of helicity index (10,5), for  $n, j, |m| \leq 3$  and  $\Lambda \leq 6$ . The energies at the potential minima ( $E_{\min}$ , in  $\text{cm}^{-1}$ ) and the zero-point energies ( $E_{zp}$ , in  $\text{cm}^{-1}$ ) are also collected. The energy values are relative to that of the ground state (0 0 0). The energy of the ground state (0 0 0) is given between parenthesis. For  $\Lambda > 0$ ,  $\Delta E_{\Lambda}=(E-E_{\Lambda=0})/\Lambda^2$ . The energies of the lowest bound states without including the rotation are presented in brackets.

| CNT(10,5)                    |      |     |                 |                        |                        |                        |                        |                        |                        |
|------------------------------|------|-----|-----------------|------------------------|------------------------|------------------------|------------------------|------------------------|------------------------|
| $d_{\text{CNT}}, \text{\AA}$ | 10.5 |     |                 |                        |                        |                        |                        |                        |                        |
| $E_{\min}, \text{cm}^{-1}$   | -725 |     |                 |                        |                        |                        |                        |                        |                        |
| $E_{zp}, \text{cm}^{-1}$     | 99   |     |                 |                        |                        |                        |                        |                        |                        |
| $n$                          | $j$  | $m$ | $E_{\Lambda=0}$ | $\Delta E_{\Lambda=1}$ | $\Delta E_{\Lambda=2}$ | $\Delta E_{\Lambda=3}$ | $\Delta E_{\Lambda=4}$ | $\Delta E_{\Lambda=5}$ | $\Delta E_{\Lambda=6}$ |
| 0                            | 0    | 0   | 0.000           | 2.905                  | 2.875                  | 2.834                  | 2.787                  | 2.737                  | 2.686                  |
|                              |      |     | (-625.627)      |                        |                        |                        |                        |                        |                        |
|                              |      |     | [-650.433]      |                        |                        |                        |                        |                        |                        |
| 0                            | 1    | 0   | 110.148         | 2.778                  | 2.754                  | 2.720                  | 2.680                  | 2.637                  | 2.593                  |
| 0                            | 1    | 1   | 140.229         | 4.183                  | 4.003                  | 3.804                  | 3.620                  | 3.459                  | 3.319                  |
| 0                            | 1    | -1  | 112.058         | 1.646                  | 1.786                  | 1.920                  | 2.020                  | 2.089                  | 2.132                  |
| 0                            | 2    | 0   | 345.202         | 2.072                  | 1.823                  | 3.939                  | 3.280                  | 3.009                  | 2.859                  |
| 0                            | 2    | 1   | 367.277         | 4.263                  | 4.019                  | 3.777                  | 3.570                  | 3.398                  | 3.253                  |
| 0                            | 2    | -1  | 345.509         | 1.360                  | 1.568                  | 1.751                  | 1.883                  | 1.972                  | 2.030                  |
| 0                            | 2    | 2   | 382.259         | 11.179                 | 7.617                  | -2.436                 | -0.676                 | 0.192                  | 0.686                  |
| 0                            | 2    | -2  | 375.399         | -4.388                 | -0.742                 | 23.674                 | 15.732                 |                        |                        |
| 0                            | 3    | 0   | 699.621         | 1.536                  | 6.118                  | 3.923                  | 3.301                  | 3.026                  | 2.867                  |
| 0                            | 3    | 1   | 720.212         | 4.155                  | 4.464                  | 3.915                  | 3.640                  | 3.440                  | 3.282                  |
| 0                            | 3    | -1  | 699.902         | 1.062                  | 1.251                  | 1.321                  | 2.197                  | 2.080                  | 2.102                  |
| 0                            | 3    | 2   | 732.272         | 10.105                 | -6.821                 | -2.347                 | -0.692                 | 0.148                  | 0.647                  |
| 0                            | 3    | -2  | 725.029         | -3.349                 |                        |                        |                        |                        |                        |
| 0                            | 3    | 3   | 749.809         | -14.283                | -6.011                 | -2.687                 | -1.871                 | -0.769                 | -0.108                 |
| 0                            | 3    | -3  | 748.891         |                        |                        |                        |                        |                        |                        |
| 1                            | 0    | 0   | 117.289         | 5.473                  | 5.003                  | 4.624                  | 4.316                  | 4.062                  | 3.849                  |
|                              |      |     | [126.178]       |                        |                        |                        |                        |                        |                        |
| 1                            | 1    | 0   | 230.937         | 5.068                  | 4.698                  | 4.383                  | 4.119                  | 3.896                  | 3.707                  |
| 1                            | 1    | 1   | 256.851         | 8.366                  | 7.172                  | 6.250                  | 5.584                  | 5.088                  | 4.704                  |
| 1                            | 1    | -1  | 234.331         | 0.745                  | 2.081                  | 2.686                  | 2.930                  | 3.014                  | 3.023                  |
| 1                            | 2    | 0   | 467.850         | 3.594                  | 33.766                 | 4.997                  | 4.496                  | 4.171                  | 3.932                  |
| 1                            | 2    | 1   | 486.606         | 8.764                  | 7.203                  | 6.181                  | 5.488                  | 4.987                  | 4.604                  |
| 1                            | 2    | -1  | 469.366         | 0.100                  | 1.685                  | 2.395                  | 2.701                  | 2.825                  | 2.863                  |
| 1                            | 2    | 2   | 505.672         | 20.008                 | -7.441                 | -7.601                 | -2.414                 | -0.244                 | 0.878                  |
| 1                            | 2    | -2  | 500.797         | -10.555                |                        |                        |                        |                        |                        |
| 1                            | 3    | 0   | 823.155         | 2.693                  | 6.391                  | 5.037                  | 4.515                  | 4.156                  | 3.904                  |
| 1                            | 3    | 1   | 841.438         | 8.763                  | 7.211                  | 6.195                  | 5.505                  | 4.997                  | 4.598                  |
| 1                            | 3    | -1  | 824.591         | 0.139                  | 1.235                  | 2.700                  | 2.799                  | 2.858                  | 2.884                  |
| 1                            | 3    | 2   | 855.690         | 19.224                 | -23.721                | -7.914                 | -2.681                 | -0.410                 | 0.735                  |
| 1                            | 3    | -2  | 851.769         | -9.411                 |                        |                        |                        |                        |                        |
| 1                            | 3    | 3   | 881.676         | -112.425               | -21.985                | -6.502                 | -2.495                 | -0.950                 | -0.013                 |
| 2                            | 0    | 0   | 205.702         | 14.606                 | 10.592                 | 8.512                  | 7.238                  | 6.370                  | 5.750                  |
|                              |      |     | [220.287]       |                        |                        |                        |                        |                        |                        |
| 2                            | 1    | 0   | 321.341         | 13.555                 | 10.000                 | 8.120                  | 6.955                  | 6.155                  | 5.568                  |
| 2                            | 1    | 1   | 353.967         | 18.234                 | 12.968                 | 10.239                 | 8.560                  | 7.430                  | 6.618                  |
| 2                            | 1    | -1  | 332.991         | -6.195                 | 2.597                  | 4.423                  | 4.722                  | 4.649                  | 4.477                  |
| 2                            | 2    | 0   | 560.816         | 9.167                  | 39.823                 | 8.425                  | 7.211                  | 6.386                  | 5.801                  |
| 2                            | 2    | 1   | 584.240         | 19.849                 | 13.255                 | 10.242                 | 8.489                  | 7.339                  | 6.523                  |
| 2                            | 2    | -1  | 568.653         | -7.433                 | 1.909                  | 3.946                  | 4.368                  | 4.372                  | 4.251                  |
| 2                            | 2    | 2   | 614.377         | 33.948                 | -15.065                | -14.486                | -7.129                 | -3.602                 | -1.729                 |
| 2                            | 2    | -2  | 612.508         | -22.713                |                        |                        |                        |                        |                        |
| 2                            | 3    | 0   | 916.083         | 9.809                  | 10.692                 | 8.332                  | 7.183                  | 6.337                  | 5.720                  |
| 2                            | 3    | 2   | 963.536         | 33.846                 | -33.855                | -14.261                | -7.068                 | -3.638                 | -1.749                 |
| 2                            | 3    | -2  | 963.445         | -22.859                |                        |                        |                        |                        |                        |
| 3                            | 0    | 0   | 292.642         | 26.942                 | 17.391                 | 13.156                 | 10.562                 | 8.953                  | 7.848                  |
|                              |      |     | [303.638]       |                        |                        |                        |                        |                        |                        |
| 3                            | 1    | 0   | 407.076         | 26.215                 | 17.094                 | 12.813                 | 10.375                 | 8.804                  | 7.706                  |
| 3                            | 1    | 1   | 457.826         | 28.894                 | 18.729                 | 14.197                 | 11.517                 | 9.759                  | 8.520                  |
| 3                            | 1    | -1  | 432.210         | -14.127                | 3.930                  | 6.744                  | 6.889                  | 6.534                  | 6.106                  |
| 3                            | 2    | 0   | 649.395         | 22.263                 |                        |                        |                        |                        |                        |
| 3                            | 2    | 1   | 685.749         | 32.389                 | 19.630                 | 14.477                 | 11.602                 | 9.767                  | 8.495                  |
| 3                            | 2    | -1  | 666.994         | -17.194                | 2.727                  | 6.054                  | 6.420                  | 6.186                  | 5.833                  |
| 3                            | 2    | 2   | 729.318         |                        |                        |                        |                        |                        |                        |
| 3                            | 2    | -2  | 730.282         | -38.239                |                        |                        |                        |                        |                        |
| 3                            | 3    | 0   | 1005.246        | 20.454                 | 17.328                 | 12.880                 | 10.475                 | 8.913                  | 7.814                  |
| 3                            | 3    | 2   | 1077.362        |                        |                        |                        |                        |                        |                        |
| 3                            | 3    | -2  | 1079.862        | -36.790                |                        |                        |                        |                        |                        |

Table S4: Energy levels (in  $\text{cm}^{-1}$ ) of a rotating  $\text{H}_2$  molecule inside nanotube of helicity index (10,10), for  $n, j, |m| \leq 3$  and  $\Lambda \leq 6$ . The energies at the potential minima ( $E_{\text{min}}$ , in  $\text{cm}^{-1}$ ) and the zero-point energies ( $E_{\text{zp}}$ , in  $\text{cm}^{-1}$ ) are also collected. The energy values are relative to that of the ground state (0 0 0). The energy of the ground state (0 0 0) is given between parenthesis. For  $\Lambda > 0$ ,  $\Delta E_{\Lambda} = (E - E_{\Lambda=0}) / \Lambda^2$ . The energies of the lowest bound states without including the rotation are presented in brackets.

| CNT(10,10)                       |      |     |                 |                        |                        |                        |                        |                        |                        |
|----------------------------------|------|-----|-----------------|------------------------|------------------------|------------------------|------------------------|------------------------|------------------------|
| $d_{\text{CNT}}, \text{\AA}$     | 13.6 |     |                 |                        |                        |                        |                        |                        |                        |
| $E_{\text{min}}, \text{cm}^{-1}$ | -575 |     |                 |                        |                        |                        |                        |                        |                        |
| $E_{\text{zp}}, \text{cm}^{-1}$  | 99   |     |                 |                        |                        |                        |                        |                        |                        |
| $n$                              | $j$  | $m$ | $E_{\Lambda=0}$ | $\Delta E_{\Lambda=1}$ | $\Delta E_{\Lambda=2}$ | $\Delta E_{\Lambda=3}$ | $\Delta E_{\Lambda=4}$ | $\Delta E_{\Lambda=5}$ | $\Delta E_{\Lambda=6}$ |
| 0                                | 0    | 0   | 0.000           | 0.727                  | 0.727                  | 0.726                  | 0.726                  | 0.725                  | 0.724                  |
|                                  |      |     | (-475.369)      |                        |                        |                        |                        |                        |                        |
|                                  |      |     | [-502.037]      |                        |                        |                        |                        |                        |                        |
| 0                                | 1    | 0   | 109.371         | 0.714                  | 0.714                  | 0.713                  | 0.712                  | 0.712                  | 0.711                  |
| 0                                | 1    | 1   | 138.983         | 0.828                  | 0.826                  | 0.824                  | 0.821                  | 0.818                  | 0.814                  |
| 0                                | 1    | -1  | 109.775         | 0.645                  | 0.646                  | 0.647                  | 0.648                  | 0.649                  | 0.651                  |
| 0                                | 2    | 0   | 342.789         | 0.680                  | 0.616                  | 0.626                  | 0.625                  | 0.624                  | 0.622                  |
| 0                                | 2    | 1   | 365.256         | 0.829                  | 0.827                  | 0.824                  | 0.820                  | 0.816                  | 0.811                  |
| 0                                | 2    | -1  | 342.748         | 0.619                  | 0.620                  | 0.622                  | 0.624                  | 0.627                  | 0.630                  |
| 0                                | 2    | 2   | 377.855         | -0.254                 | 0.997                  | 1.116                  | 1.121                  | 1.033                  | 1.035                  |
| 0                                | 2    | -2  | 367.170         | 0.129                  | 0.241                  | 0.401                  | 0.379                  | 0.444                  | 0.492                  |
| 0                                | 3    | 0   | 696.437         | 0.564                  | 0.568                  | 0.568                  | 0.567                  | 6.426                  | 4.711                  |
| 0                                | 3    | 1   | 716.105         | 0.649                  | 0.589                  | 1.434                  | 1.082                  | 0.951                  | 0.899                  |
| 0                                | 3    | -1  | 696.436         | 0.575                  | 0.559                  | 0.567                  | 0.568                  | 0.568                  | 0.568                  |
| 0                                | 3    | 2   | 726.391         | 1.296                  | 1.233                  | 1.173                  | 1.119                  | -0.631                 | -0.264                 |
| 0                                | 3    | -2  | 716.485         | 0.316                  | 0.374                  | 0.435                  | 0.486                  | 0.529                  | 0.563                  |
| 1                                | 0    | 0   | 123.191         | 0.895                  | 0.894                  | 0.892                  | 0.889                  | 0.885                  | 0.881                  |
|                                  |      |     | [130.899]       |                        |                        |                        |                        |                        |                        |
| 1                                | 1    | 0   | 235.674         | 0.876                  | 0.875                  | 0.873                  | 0.870                  | 0.867                  | 0.863                  |
| 1                                | 1    | 1   | 258.877         | 1.070                  | 1.064                  | 1.056                  | 1.045                  | 1.034                  | 1.021                  |
| 1                                | 1    | -1  | 236.068         | 0.748                  | 0.751                  | 0.755                  | 0.759                  | 0.763                  | 0.767                  |
| 1                                | 2    | 0   | 470.371         | 0.765                  | 0.859                  | 0.724                  | 0.717                  | 5.376                  | 4.074                  |
| 1                                | 2    | 1   | 487.858         | 1.082                  | 1.074                  | 1.062                  | 1.048                  | 1.033                  | 1.018                  |
| 1                                | 2    | -1  | 470.381         | 0.698                  | 0.704                  | 0.711                  | 0.720                  | 0.728                  | 0.735                  |
| 1                                | 2    | 2   | 499.811         | 0.215                  | 1.511                  | 1.562                  | 1.407                  | -0.468                 | -0.112                 |
| 1                                | 2    | -2  | 490.208         | -0.112                 | 0.183                  | 0.278                  | 0.455                  | 0.559                  |                        |
| 1                                | 3    | 0   | 824.798         | 0.632                  | 0.622                  | 0.622                  | 7.805                  | 5.385                  | 4.076                  |
| 1                                | 3    | 2   | 848.841         | 1.982                  | 1.758                  | 1.592                  | -0.881                 | -3.824                 | -2.365                 |
| 1                                | 3    | -2  | 841.186         | 0.094                  | 0.296                  | 0.451                  | 0.562                  |                        |                        |
| 2                                | 0    | 0   | 218.204         | 1.247                  | 1.238                  | 1.224                  | 1.207                  | 1.188                  | 1.169                  |
|                                  |      |     | [231.836]       |                        |                        |                        |                        |                        |                        |
| 2                                | 1    | 0   | 332.906         | 1.211                  | 1.203                  | 1.190                  | 1.176                  | 1.159                  | 1.142                  |
| 2                                | 1    | 1   | 350.725         | 1.632                  | 1.595                  | 1.547                  | 1.496                  | 1.447                  | 1.401                  |
| 2                                | 1    | -1  | 333.508         | 0.886                  | 0.908                  | 0.932                  | 0.953                  | 0.967                  | 0.976                  |
| 2                                | 2    | 0   | 569.158         | 0.498                  | 0.796                  | 0.811                  | 1.609                  | 4.753                  | 3.781                  |
| 2                                | 2    | 1   | 581.976         | 1.679                  | 1.625                  | 1.561                  | 1.500                  | 1.443                  | 1.393                  |
| 2                                | 2    | -1  | 568.833         | 0.771                  | 0.810                  | 0.852                  | 0.886                  | 0.910                  | 0.927                  |
| 2                                | 2    | 2   | 592.094         | 4.737                  | 2.766                  | 2.420                  | -0.625                 | -2.323                 | -1.248                 |
| 2                                | 2    | -2  | 585.367         | -1.427                 | -0.105                 | 0.434                  |                        |                        |                        |
| 2                                | 3    | 0   | 923.817         | 0.732                  | 0.678                  | 2.059                  |                        |                        |                        |
| 2                                | 3    | 2   | 942.996         | 3.652                  | 2.832                  | -1.453                 | -4.411                 | -4.104                 | -2.653                 |
| 2                                | 3    | -2  | 937.686         | -0.736                 | 0.091                  |                        |                        |                        |                        |
| 3                                | 0    | 0   | 286.614         | 2.321                  | 2.165                  | 2.028                  | 1.910                  | 1.809                  | 1.721                  |
|                                  |      |     | [304.817]       |                        |                        |                        |                        |                        |                        |
| 3                                | 1    | 0   | 402.903         | 2.202                  | 2.072                  | 1.953                  | 1.849                  | 1.757                  | 1.678                  |
| 3                                | 1    | 1   | 416.994         | 3.345                  | 3.005                  | 2.686                  | 2.435                  | 2.240                  | 2.084                  |
| 3                                | 1    | -1  | 404.416         | 0.712                  | 1.084                  | 1.278                  | 1.360                  | 1.387                  | 1.387                  |
| 3                                | 2    | 0   | 639.756         | 1.701                  |                        |                        |                        |                        |                        |
| 3                                | 2    | 1   | 650.062         | 3.569                  | 3.072                  | 2.696                  | 2.424                  | 2.220                  | 2.061                  |
| 3                                | 2    | -1  | 640.480         | 0.400                  | 0.888                  | 1.138                  | 1.252                  | 1.300                  | 1.314                  |



Table S5: Energy levels (in  $\text{cm}^{-1}$ ) of a rotating  $\text{H}_2$  molecule outside the nanotube of helicity index (10,10), for  $n, j, |m| \leq 3$  and  $\Lambda \leq 6$ . The energies at the potential minima ( $E_{\text{min}}$ , in  $\text{cm}^{-1}$ ) and the zero-point energies ( $E_{\text{zp}}$ , in  $\text{cm}^{-1}$ ) are also collected. The energy values are relative to that of the ground state (0 0 0). The energy of the ground state (0 0 0) is given between parenthesis. For  $\Lambda > 0$ ,  $\Delta E_{\Lambda} = (E - E_{\Lambda=0})/\Lambda^2$ . The energies of the lowest bound states without including the rotation are presented in brackets.

| CNT(10,10)                       |       |     |                 |                        |                        |                        |                        |                        |                        |
|----------------------------------|-------|-----|-----------------|------------------------|------------------------|------------------------|------------------------|------------------------|------------------------|
| $d_{\text{CNT}}, \text{\AA}$     | 13.6  |     |                 |                        |                        |                        |                        |                        |                        |
| $R_{\text{min}}, \text{\AA}$     | 9.914 |     |                 |                        |                        |                        |                        |                        |                        |
| $E_{\text{min}}, \text{cm}^{-1}$ | -296  |     |                 |                        |                        |                        |                        |                        |                        |
| $E_{\text{zp}}, \text{cm}^{-1}$  | 81    |     |                 |                        |                        |                        |                        |                        |                        |
| $n$                              | $j$   | $m$ | $E_{\Lambda=0}$ | $\Delta E_{\Lambda=1}$ | $\Delta E_{\Lambda=2}$ | $\Delta E_{\Lambda=3}$ | $\Delta E_{\Lambda=4}$ | $\Delta E_{\Lambda=5}$ | $\Delta E_{\Lambda=6}$ |
| 0                                | 0     | 0   | 0.000           | 0.081                  | 0.081                  | 0.081                  | 0.081                  | 0.081                  | 0.081                  |
|                                  |       |     | (-215.516)      |                        |                        |                        |                        |                        |                        |
|                                  |       |     | [-233.840]      |                        |                        |                        |                        |                        |                        |
| 0                                | 1     | 0   | 112.222         | 0.082                  | 0.082                  | 0.082                  | 0.082                  | 0.082                  | 0.082                  |
| 0                                | 1     | 1   | 130.974         | 0.082                  | 0.082                  | 0.082                  | 0.082                  | 0.082                  | 0.082                  |
| 0                                | 1     | -1  | 112.313         | 0.081                  | 0.081                  | 0.081                  | 0.081                  | 0.081                  | 0.081                  |
| 0                                | 2     | 0   | 346.558         | 0.081                  | 0.081                  | 0.081                  | 0.081                  | 0.080                  | 0.080                  |
| 0                                | 2     | 1   | 361.193         | 0.083                  | 0.083                  | 0.083                  | 0.083                  | 0.083                  | 0.083                  |
| 0                                | 2     | -1  | 346.560         | 0.080                  | 0.080                  | 0.080                  | 0.080                  | 0.080                  | 0.080                  |
| 0                                | 2     | 2   | 367.951         | 0.092                  | 0.092                  | 0.092                  | 0.091                  | 0.091                  | 0.091                  |
| 0                                | 2     | -2  | 361.452         | 0.071                  | 0.071                  | 0.071                  | 0.071                  | 0.072                  | 0.072                  |
| 0                                | 3     | 0   | 700.804         | 0.079                  | 0.079                  | 0.079                  | 0.079                  | 0.079                  | 0.079                  |
| 0                                | 3     | 1   | 713.022         | 0.077                  | 0.076                  | 0.076                  | 0.076                  | 0.076                  | 0.076                  |
| 0                                | 3     | -1  | 700.804         | 0.079                  | 0.079                  | 0.079                  | 0.079                  | 0.079                  | 0.079                  |
| 0                                | 3     | 2   | 719.869         | 0.090                  | 0.090                  | 0.090                  | 0.090                  | 0.090                  | 0.090                  |
| 0                                | 3     | -2  | 713.036         | 0.075                  | 0.075                  | 0.075                  | 0.075                  | 0.075                  | 0.075                  |
| 1                                | 0     | 0   | 93.195          | 0.076                  | 0.076                  | 0.076                  | 0.076                  | 0.076                  | 0.076                  |
|                                  |       |     | [100.079]       |                        |                        |                        |                        |                        |                        |
| 1                                | 1     | 0   | 208.018         | 0.076                  | 0.076                  | 0.076                  | 0.076                  | 0.076                  | 0.076                  |
| 1                                | 1     | 1   | 220.864         | 0.076                  | 0.076                  | 0.076                  | 0.076                  | 0.076                  | 0.076                  |
| 1                                | 1     | -1  | 208.069         | 0.075                  | 0.075                  | 0.075                  | 0.075                  | 0.075                  | 0.075                  |
| 1                                | 2     | 0   | 443.506         | 0.074                  | 0.074                  | 0.074                  | 0.074                  | 0.074                  | 0.074                  |
| 1                                | 2     | 1   | 453.361         | 0.077                  | 0.077                  | 0.077                  | 0.077                  | 0.077                  | 0.077                  |
| 1                                | 2     | -1  | 443.503         | 0.074                  | 0.074                  | 0.074                  | 0.074                  | 0.074                  | 0.074                  |
| 1                                | 2     | 2   | 458.592         | 0.088                  | 0.088                  | 0.087                  | 0.087                  | 0.087                  | 0.087                  |
| 1                                | 2     | -2  | 453.576         | 0.064                  | 0.064                  | 0.064                  | 0.065                  | 0.065                  | 0.065                  |
| 1                                | 3     | 0   | 798.412         | 0.073                  | 0.073                  | 0.073                  | 0.073                  | 0.073                  | 0.073                  |
| 1                                | 3     | 2   | 811.418         | 0.087                  | 0.087                  | 0.087                  | 0.087                  | 0.086                  | 0.086                  |
| 1                                | 3     | -2  | 806.638         | 0.068                  | 0.068                  | 0.068                  | 0.068                  | 0.068                  | 0.068                  |
| 2                                | 0     | 0   | 155.322         | 0.069                  | 0.069                  | 0.069                  | 0.069                  | 0.069                  | 0.069                  |
|                                  |       |     | [166.508]       |                        |                        |                        |                        |                        |                        |
| 2                                | 1     | 0   | 271.706         | 0.069                  | 0.069                  | 0.069                  | 0.069                  | 0.069                  | 0.069                  |
| 2                                | 1     | 1   | 279.919         | 0.069                  | 0.069                  | 0.069                  | 0.069                  | 0.069                  | 0.069                  |
| 2                                | 1     | -1  | 271.743         | 0.067                  | 0.067                  | 0.067                  | 0.067                  | 0.067                  | 0.067                  |
| 2                                | 2     | 0   | 507.901         | 0.067                  | 0.067                  | 0.067                  | 0.067                  | 0.067                  | 0.067                  |
| 2                                | 2     | 1   | 514.236         | 0.071                  | 0.071                  | 0.071                  | 0.071                  | 0.071                  | 0.071                  |
| 2                                | 2     | -1  | 507.907         | 0.067                  | 0.067                  | 0.067                  | 0.067                  | 0.067                  | 0.067                  |
| 2                                | 2     | 2   | 518.548         | 0.078                  | 0.078                  | 0.078                  | 0.078                  | 0.078                  | 0.078                  |
| 2                                | 2     | -2  | 514.422         | 0.063                  | 0.063                  | 0.063                  | 0.064                  | 0.064                  | 0.064                  |
| 2                                | 3     | 0   | 863.236         | 0.065                  | 0.065                  | 0.065                  | 0.065                  | 0.065                  | 0.065                  |
| 2                                | 3     | 2   | 871.662         | 0.083                  | 0.083                  | 0.082                  | 0.082                  | 0.082                  | 0.081                  |
| 2                                | 3     | -2  | 868.585         | 0.058                  | 0.058                  | 0.059                  | 0.059                  | 0.059                  | 0.060                  |
| 3                                | 0     | 0   | 195.549         | 0.063                  | 0.063                  | 0.063                  | 0.063                  | 0.063                  | 0.063                  |
|                                  |       |     | [208.683]       |                        |                        |                        |                        |                        |                        |
| 3                                | 1     | 0   | 312.511         | 0.063                  | 0.063                  | 0.063                  | 0.063                  | 0.063                  | 0.063                  |
| 3                                | 1     | 1   | 319.371         | 0.065                  | 0.065                  | 0.065                  | 0.065                  | 0.065                  | 0.065                  |
| 3                                | 1     | -1  | 312.522         | 0.061                  | 0.061                  | 0.061                  | 0.061                  | 0.061                  | 0.061                  |
| 3                                | 2     | 0   | 549.010         | 0.060                  | 0.060                  | 0.060                  | 0.060                  | 0.060                  | 0.060                  |
| 3                                | 2     | 1   | 554.048         | 0.066                  | 0.066                  | 0.066                  | 0.066                  | 0.066                  | 0.066                  |
| 3                                | 2     | -1  | 549.010         | 0.060                  | 0.060                  | 0.060                  | 0.060                  | 0.060                  | 0.060                  |

### S3 Calculation of angular factors

In practice, we used the following functions as angular basis in our computer codes:

$$\Theta_{j|m|}(x) \frac{\exp(im\phi)}{\sqrt{(2\pi)}}$$

where  $x = \cos \theta$  and  $\Theta_{j|m|}(x)$  are the associated Legendre functions. These basis functions only differ from spherical harmonics  $Y_{jm}$  by a phase factor for  $m < 0$ . The angular factors (cf. Eq. (7) of the main text) can be expressed as:

$$\langle j'm'|(1-x^2)^I \cos^{2K}(\phi)|jm\rangle = \langle \Theta_{j'|m'}(x)|(1-x^2)^I|\Theta_{j|m|}(x)\rangle \langle m'|\cos^{2K}(\phi)|m\rangle$$

where the factors depending on  $\phi$  can easily be evaluated from

$$\cos^2(\phi) = \frac{2 + \exp(2i\phi) + \exp(-2i\phi)}{4}$$

and

$$\langle m'|\exp(iM\phi)|m\rangle = \delta_{m',m+M}$$

In order to perform the integrals over  $x$ , the following relation can be used recursively:

$$(1-x^2)\Theta_{jK} = -a_{j-2,-K}a_{j-1,-(K+1)}\Theta_{j-2K} - a_{jK}a_{j+1,-(K+1)}\Theta_{j+2K} + \left(a_{j-1,-(K+1)}^2 + a_{jK}^2\right)\Theta_{jK}$$

with

$$a_{jK} = \sqrt{\frac{(j+K+1)(j+K+2)}{(2j+1)(2j+3)}}$$

## S4 On the degeneracy of $(n\ 1\ 0)$ and $(n\ 1\ 1a)$ levels

From the results presented in the main text and above, we can see that, apart from (5,5) nanotube, the energy levels  $(n\ 1\ 0)$  and  $(n\ 1\ 1a)$  are almost degenerate while the levels  $(n\ 1\ 1s)$  and  $(n\ 1\ 1a)$  have different energies. Looking at the decomposition in Table 3 of the main text, it can be observed that the difference comes mainly from the potential term and, to a lesser extent, from the kinetic  $R$ -dependent  $K(R)$  term. To understand better the origin of this degeneracy, we provide in Table S6 the list of the main contributions to the potential for the  $(n\ 1\ m)$  levels associated to a  $H_2$  molecule rotating outside the nanotube of helicity index (10,10) and inside the nanotube of helicity index (5,5). These contributions are given as a function of indexes  $I$  and  $K$ , see Eq. (5) of the main text (in  $\text{cm}^{-1}$ ).

Table S6: Contributions from different  $p_{JK}$  terms of the potential to the  $(n = 0\ j = 1)$  levels of a single  $H_2$  molecule rotating outside of the nanotube of helicity index (10,10) and inside the nanotube of helicity index (5,5) (in  $\text{cm}^{-1}$ ). The different kinetic energy contributions are also provided.

| $I, K$          | (10,10)-ext |          |          | (5,5)     |           |           |
|-----------------|-------------|----------|----------|-----------|-----------|-----------|
|                 | (0 1 0)     | (0 1 1a) | (0 1 1s) | (0 1 0)   | (0 1 1a)  | (0 1 1s)  |
| 0,0             | -260.698    | -260.800 | -251.257 | -1330.062 | -1276.432 | -1287.344 |
| 1,0             | 0.111       | 0.199    | 0.547    | 70.376    | 160.881   | 157.534   |
| 1,1             | 9.592       | 9.708    | 18.242   | 10.123    | 14.710    | 42.554    |
| 2,1             | -0.181      | -0.278   | -0.621   | 0.208     | 0.460     | 1.338     |
| 2,2             | 0.714       | 0.718    | 3.021    | -0.0086   | -0.015    | -0.072    |
| Total (pot)     | -250.456    | -250.440 | -230.048 | -1245.622 | -1087.390 | -1073.291 |
| $K(R)$          | 28.068      | 28.055   | 26.349   | 183.653   | 160.341   | 168.339   |
| $K(\text{int})$ | 119.093     | 119.100  | 119.078  | 125.463   | 125.577   | 127.997   |
| $K(\text{ext})$ | 0.00016     | 0.082    | 0.080    | 0.026     | 113.214   | 119.229   |

From the expression of the angular factor given in section S3, it is clear that the  $K = 0$  term gives no splitting of  $j = 1$  levels. For  $K = I = 1$ , the  $\theta$ -dependent factor is equal to  $2/5$  (for  $m = 0$ ) and  $4/5$  (for  $m = 1$ ) while the  $\phi$ -dependent factor is equal to  $1/2$  for  $\Delta m = 0$  and  $1/4$  for  $\Delta m = 2$ . It is easy to notice that the contribution of  $\phi$ -factors  $f$  to  $1a/1s$  term is  $\langle 1|f|1 \rangle \mp \langle 1|f|-1 \rangle$  and, then,  $f$  results in  $1/2 \mp 1/4 = 1/4, 3/4$  for  $K = 1$ . Therefore, it turns out that the total  $\theta, \phi$  factor for  $I = K = 1$  is exactly the same (i.e.,  $1/5$ ) for  $(n\ 1\ 0)$  and  $(n\ 1\ 1a)$  levels, but three times larger for

the  $(n\ 1\ 1s)$  level.

From Eq. (5) of the main text and section S1, it can be shown that the  $I = K = 1$  term comes from potential expansion terms  $V_L$  [Eq. (4)] for which  $L \geq I + K = 2$ , with the term  $V_2$  being the most important. The splitting of  $(n\ 1\ 0)$  and  $(n\ 1\ 1a)$  levels would arise from  $I = 2$  and  $K = 1$  factors which are related to the, much smaller,  $V_3$  coefficient (see Table S1).

The difference in potential contributions to  $(n\ 1\ 0)$  and  $(n\ 1\ 1s)$  levels clearly leads to modification of radial factors as shown in Figure S2. Therefore, although the expected contribution of the term  $I = K = 1$  is three times larger for  $(n\ 1\ 1s)$  levels than for  $(n\ 1\ 0)$  levels, in practice it is only two times larger for the particular case of the  $(n = 0\ j = 1)$  levels of a  $H_2$  molecule rotating in the outside of the (10,10) nanotube (see Table S6). Also, it leads to the modification of the  $K(R)$  contributions noticed above.

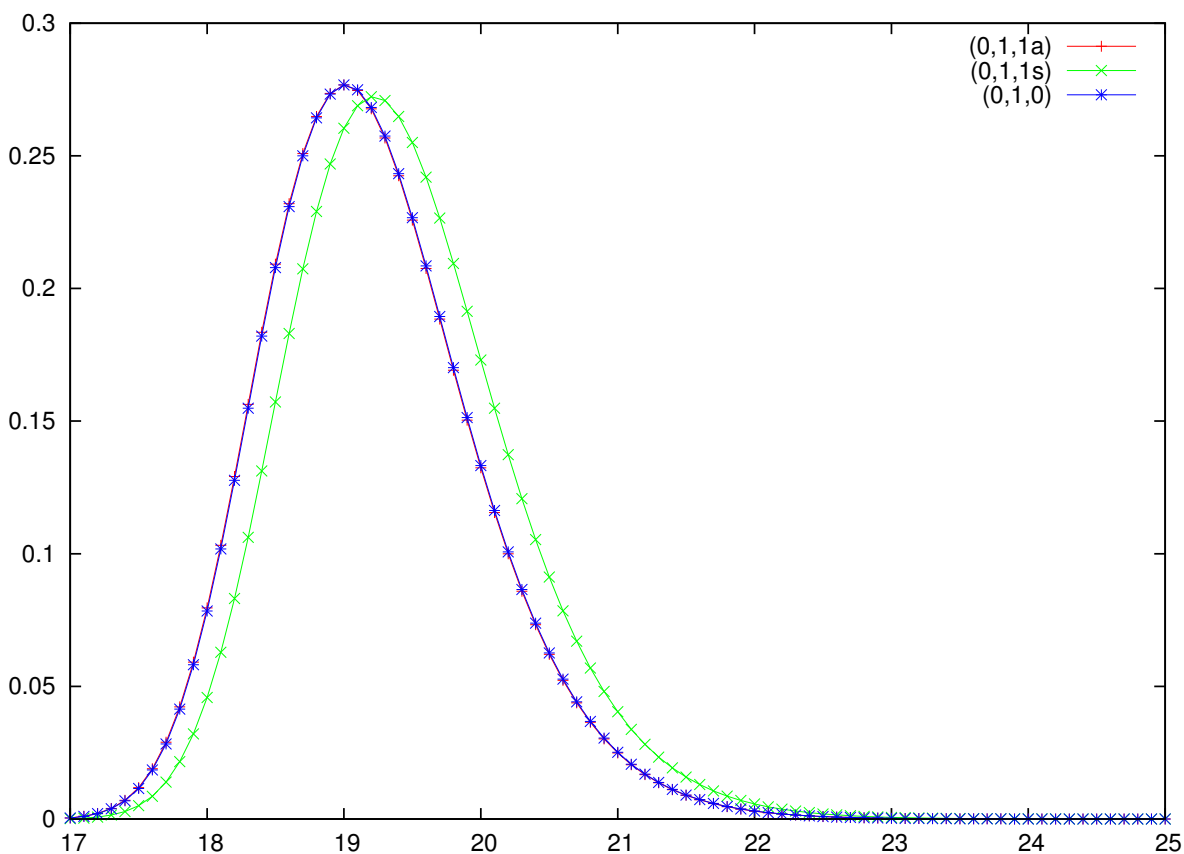

Figure S2: Picture showing the modification of the radial factor for the  $(0\ 1\ 0)$  and  $(0\ 1\ 1s)$  levels of a  $H_2$  molecule rotating outside the (10,10) nanotube.

The situation is quite different for a  $H_2$  molecule rotating inside the narrow nanotube of helicity index (5,5). In this case, the term  $K_{\text{ext}}$  containing the factor  $1/R^2$  becomes much more important, causing the splitting of (0 1 0) and (0 1 1) levels. The radial factors are similar for (0 1 1a) and (0 1 1s) states and different from that of the (0 1 0) state, as shown in Figure S3. Finally, the combination of different contribution to total energy leads to a smaller splitting (as compared with the  $m = 0 - m = 1$  splitting) of (0 1 1a) and (0 1 1s) levels, as can be seen in Tables S2 and S6.

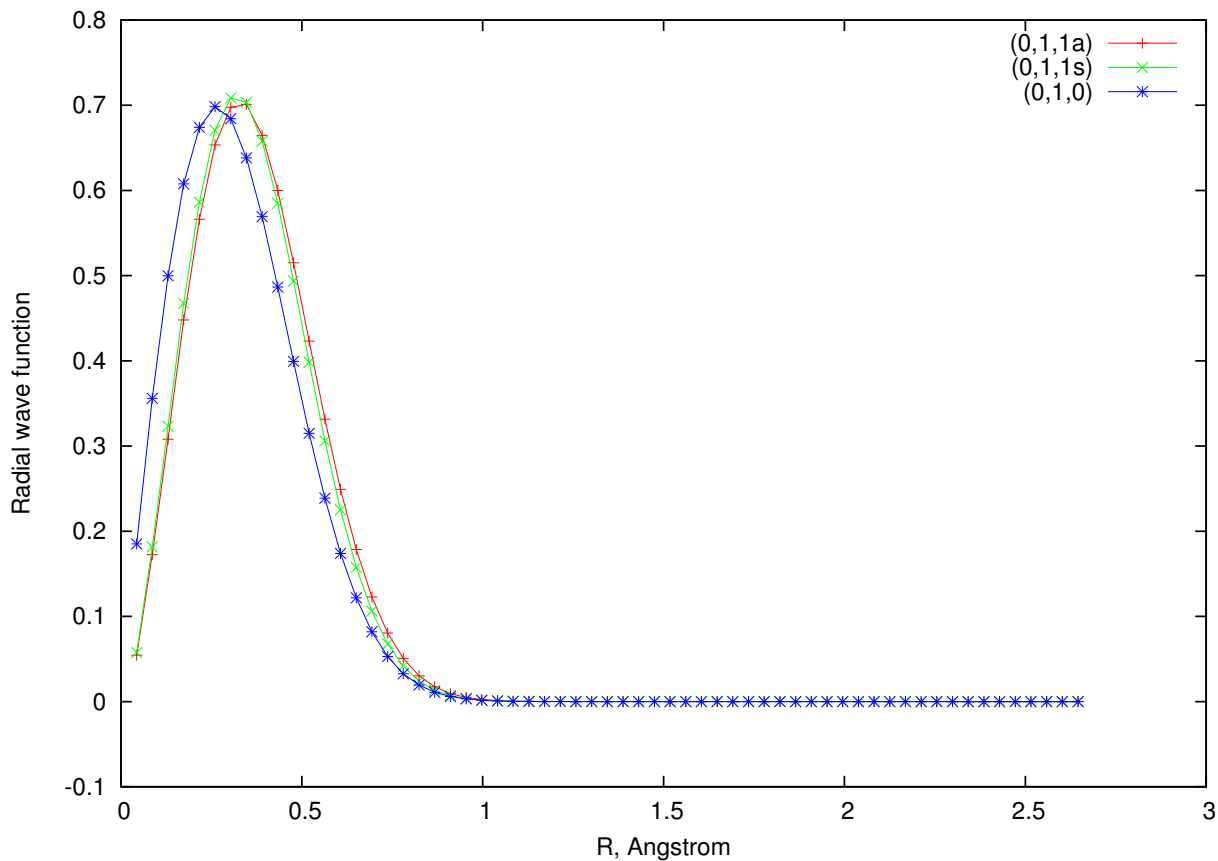

Figure S3: Picture showing the modification of the radial factor for  $n = 0, j = 1$  levels of a  $H_2$  molecule rotating inside the (5,5) nanotube.
